# Supplementary material for: Can Rare Earth Elements Be Considered as Markers of the Varietal and Geographical Origin of Wines?
Source: MDPI journal article supplement (doi:10.3390/molecules28114319), 2023-05-24
Supplement: s1 [file s1]

**Table S1.** Content of REE in untreated and treated with bentonite clays wines.

| №  | Wine sample                               | Element, µg/L |      |       |      |      |      |      |      |      |      |      |      |      |      |      |
|----|-------------------------------------------|---------------|------|-------|------|------|------|------|------|------|------|------|------|------|------|------|
|    |                                           | Y             | La   | Ce    | Pr   | Nd   | Sm   | Eu   | Gd   | Tb   | Dy   | Ho   | Er   | Tm   | Yb   | Lu   |
| 1  | Cabernet Sauvignon untreated              | 0.29          | 0.18 | 0.19  | <LOQ |
| 2  | Cabernet Sauvignon treated with bentonite | 1.38          | 0.90 | 1.55  | 0.26 | 0.51 | 0.13 | 0.14 | 0.20 | 0.08 | 0.16 | 0.08 | 0.18 | 0.08 | 0.25 | 0.09 |
| 3  | Cabernet Sauvignon treated with bentonite | 4.86          | 1.31 | 2.73  | 0.28 | 1.97 | 0.27 | 0.13 | 0.39 | 0.10 | 0.42 | <LOQ | 0.59 | 0.12 | 0.51 | 0.14 |
| 4  | Cabernet Sauvignon treated with bentonite | 1.53          | 0.90 | 1.75  | 0.55 | 2.51 | 0.13 | 0.18 | 0.59 | 0.07 | 0.17 | 0.08 | 0.17 | 0.07 | 0.18 | 0.08 |
| 5  | Cabernet Sauvignon treated with bentonite | 1.06          | 1.21 | 1.61  | 0.64 | 2.26 | 0.14 | 0.12 | 1.85 | 0.06 | 0.09 | 0.07 | 0.10 | 0.06 | 0.10 | 0.06 |
| 6  | Cabernet Sauvignon treated with bentonite | 1.80          | 0.70 | 2.12  | 0.22 | 0.34 | 0.10 | 0.11 | 2.41 | 0.06 | 0.15 | 0.08 | 0.14 | 0.08 | 0.26 | 0.09 |
| 7  | Cabernet Sauvignon treated with bentonite | 4.33          | 1.61 | 4.88  | 0.28 | 1.08 | 0.28 | 0.16 | 0.51 | 0.10 | 0.45 | 0.25 | 0.39 | 0.10 | 0.52 | 0.12 |
| 8  | Cabernet Sauvignon treated with bentonite | 1.29          | 2.03 | 2.82  | 0.37 | 1.42 | 0.37 | 0.13 | 0.46 | 0.10 | 0.47 | 0.33 | 0.44 | 0.09 | 0.17 | 0.09 |
| 9  | Cabernet Sauvignon treated with bentonite | 1.39          | 1.91 | 2.64  | 0.65 | 0.44 | 0.12 | 0.11 | 0.25 | 0.07 | 0.21 | 0.09 | 0.21 | 0.08 | 0.15 | 0.10 |
| 10 | Cabernet Sauvignon treated with bentonite | 1.85          | 2.51 | 5.31  | 1.05 | 3.89 | 0.44 | 0.21 | 0.57 | 0.42 | 0.57 | 0.67 | 0.44 | 0.22 | 0.57 | 0.15 |
| 11 | Cabernet Sauvignon treated with bentonite | 2.29          | 1.10 | 1.67  | 0.36 | 0.64 | 0.25 | 0.12 | 0.35 | 0.07 | 0.29 | 0.09 | 0.22 | 0.06 | 0.22 | 0.07 |
| 12 | Cabernet Sauvignon treated with bentonite | 1.06          | 0.64 | 6.42  | 1.14 | 2.29 | 0.75 | 0.07 | 1.14 | 0.15 | 0.43 | 0.14 | 0.24 | 0.09 | 0.27 | 0.13 |
| 13 | Cabernet Sauvignon treated with bentonite | 1.60          | 1.10 | 6.70  | 0.65 | 2.03 | 0.48 | 0.17 | 0.98 | 0.12 | 0.52 | 0.36 | 0.36 | 0.09 | 0.36 | 0.11 |
| 14 | Cabernet Sauvignon treated with bentonite | 2.66          | 3.15 | 8.93  | 2.16 | 4.24 | 1.56 | 0.45 | 2.10 | 0.41 | 1.13 | 0.34 | 0.46 | 0.21 | 0.74 | 0.24 |
| 15 | Cabernet Sauvignon treated with bentonite | 1.80          | 3.87 | 3.04  | 0.42 | 1.55 | 0.41 | 0.21 | 0.76 | 0.11 | 0.45 | 0.17 | 0.40 | 0.12 | 0.47 | 0.15 |
| 16 | Cabernet Sauvignon treated with bentonite | 0.85          | 2.31 | 12.36 | 2.55 | 0.68 | 1.25 | 0.52 | 1.91 | 0.15 | 0.29 | 0.16 | 0.38 | 0.15 | 0.28 | 0.17 |

| №  | Wine sample                               | Element, µg/L |      |      |      |      |      |      |      |      |      |      |      |      |      |      |
|----|-------------------------------------------|---------------|------|------|------|------|------|------|------|------|------|------|------|------|------|------|
|    |                                           | Y             | La   | Ce   | Pr   | Nd   | Sm   | Eu   | Gd   | Tb   | Dy   | Ho   | Er   | Tm   | Yb   | Lu   |
| 17 | Cabernet Sauvignon treated with bentonite | 0.64          | 1.86 | 2.51 | 0.41 | 0.37 | 0.10 | 0.07 | 0.52 | 0.05 | 0.11 | 0.05 | 0.10 | 0.05 | 0.10 | 0.09 |
| 18 | Cabernet Sauvignon treated with bentonite | 0.93          | 1.62 | 2.67 | 0.36 | 0.43 | 0.15 | 0.09 | 0.54 | 0.08 | 0.15 | 0.08 | 0.15 | 0.08 | 0.13 | 0.05 |
| 19 | Cabernet Sauvignon treated with bentonite | 4.16          | 1.77 | 6.89 | 0.70 | 2.98 | 0.70 | 0.22 | 0.88 | 0.20 | 0.76 | 0.25 | 0.37 | 0.22 | 0.41 | 0.26 |
| 20 | Cabernet Sauvignon treated with bentonite | 4.25          | 1.84 | 6.83 | 0.70 | 1.85 | 0.70 | 0.15 | 0.90 | 0.15 | 0.75 | 0.23 | 0.37 | 0.22 | 0.47 | 0.28 |
| 21 | Cabernet Sauvignon treated with bentonite | 1.64          | 2.50 | 5.33 | 0.87 | 2.85 | 1.28 | 0.15 | 1.82 | 0.25 | 1.03 | 0.34 | 0.32 | 0.18 | 0.69 | 0.19 |
| 22 | Cabernet Sauvignon treated with bentonite | 1.84          | 2.52 | 5.33 | 0.82 | 2.96 | 1.35 | 0.19 | 1.89 | 0.25 | 1.05 | 0.30 | 0.39 | 0.16 | 0.72 | 0.16 |
| 23 | Cabernet Sauvignon treated with bentonite | 1.68          | 2.80 | 8.12 | 0.93 | 3.07 | 1.54 | 0.23 | 2.05 | 0.27 | 1.07 | 0.33 | 0.35 | 0.17 | 0.82 | 0.22 |
| 24 | Cabernet Sauvignon treated with bentonite | 4.95          | 2.05 | 8.52 | 0.85 | 3.23 | 0.73 | 0.18 | 1.09 | 0.17 | 0.83 | 0.28 | 0.38 | 0.22 | 0.49 | 0.32 |
| 25 | Cabernet Sauvignon treated with bentonite | 1.59          | 2.42 | 4.73 | 0.32 | 1.02 | 0.22 | 0.10 | 0.62 | 0.08 | 0.32 | 0.12 | 0.31 | 0.08 | 0.34 | 0.10 |
| 26 | Cabernet Sauvignon treated with bentonite | 1.28          | 1.72 | 2.21 | 0.12 | 0.38 | 0.09 | 0.09 | 0.43 | 0.05 | 0.12 | 0.07 | 0.16 | 0.06 | 0.23 | 0.07 |
| 27 | Cabernet Sauvignon treated with bentonite | 1.18          | 0.72 | 2.19 | 0.12 | 0.57 | 0.11 | 0.07 | 0.47 | <LOQ | 0.33 | 0.06 | 0.12 | 0.05 | 0.18 | 0.07 |
| 28 | Cabernet Sauvignon treated with bentonite | 1.79          | 2.92 | 5.40 | 0.85 | 3.72 | 0.83 | 0.25 | 1.25 | 0.17 | 1.85 | 0.23 | 0.63 | 0.14 | 0.29 | 0.15 |
| 29 | Cabernet Sauvignon treated with bentonite | 1.27          | 1.30 | 2.54 | 0.23 | 0.76 | 0.17 | 0.11 | 0.54 | 0.06 | 0.65 | 0.09 | 0.24 | 0.07 | 0.32 | 0.09 |
| 30 | Cabernet Sauvignon treated with bentonite | 1.46          | 0.97 | 2.75 | 0.18 | 0.51 | 0.14 | 0.09 | 0.20 | 0.05 | 0.27 | 0.07 | 0.11 | 0.06 | 0.19 | 0.13 |
| 31 | Cabernet Sauvignon treated with bentonite | 1.79          | 1.12 | 2.70 | 0.55 | 1.45 | 0.20 | 0.14 | 0.45 | 0.10 | 0.33 | 0.08 | 0.13 | 0.09 | 0.23 | 0.02 |
| 32 | Cabernet Sauvignon treated with bentonite | 3.35          | 2.01 | 7.86 | 0.48 | 1.87 | 0.65 | 0.18 | 0.58 | 0.11 | 0.47 | 0.10 | 0.66 | 0.06 | 0.25 | 0.11 |
| 33 | Cabernet Sauvignon treated with bentonite | 5.54          | 2.50 | 3.27 | 0.89 | 2.12 | 0.78 | 0.29 | 1.74 | 0.25 | 1.99 | 0.48 | 0.87 | 0.12 | 0.88 |      |

| №  | Wine sample                   | Element, µg/L |      |       |      |      |      |      |      |      |      |      |      |      |      |      |
|----|-------------------------------|---------------|------|-------|------|------|------|------|------|------|------|------|------|------|------|------|
|    |                               | Y             | La   | Ce    | Pr   | Nd   | Sm   | Eu   | Gd   | Tb   | Dy   | Ho   | Er   | Tm   | Yb   | Lu   |
|    |                               |               |      |       |      |      |      |      |      |      |      |      |      |      |      | 0.33 |
| 34 | Merlot untreated              | 0.11          | 0.05 | 0.08  | <LOQ |
| 35 | Merlot treated with bentonite | 0.79          | 0.37 | 1.04  | 0.18 | 0.35 | 0.12 | 0.06 | 0.06 | <LOQ | 0.13 | <LOQ | 0.10 | <LOQ | 0.24 | <LOQ |
| 36 | Merlot treated with bentonite | 3.25          | 1.45 | 2.60  | 0.23 | 1.44 | 0.34 | 0.14 | 0.25 | 0.05 | 0.30 | 0.09 | 0.53 | 0.02 | 0.97 | 0.13 |
| 37 | Merlot treated with bentonite | 0.79          | 1.05 | 1.28  | 0.42 | 2.46 | 0.07 | 0.15 | 0.47 | <LOQ | 0.14 | <LOQ | 0.07 | <LOQ | 0.31 | <LOQ |
| 38 | Merlot treated with bentonite | 0.54          | 1.50 | 0.91  | 0.46 | 2.12 | 0.20 | 0.14 | 0.66 | <LOQ | 0.06 | <LOQ | 0.04 | <LOQ | 0.08 | <LOQ |
| 39 | Merlot treated with bentonite | 1.52          | 0.73 | 1.88  | <LOQ | 0.32 | <LOQ | 0.03 | 1.68 | <LOQ | 0.12 | <LOQ | 0.10 | <LOQ | 0.40 | <LOQ |
| 40 | Merlot treated with bentonite | 3.21          | 0.78 | 3.98  | 0.22 | 0.92 | 0.18 | 0.06 | 0.83 | <LOQ | 0.37 | 0.24 | 0.26 | 0.03 | 0.87 | 0.14 |
| 41 | Merlot treated with bentonite | 1.03          | 1.71 | 1.97  | 0.52 | 0.93 | 0.24 | 0.04 | 0.51 | <LOQ | 0.33 | 0.20 | 0.32 | <LOQ | 0.26 | <LOQ |
| 42 | Merlot treated with bentonite | 1.09          | 1.45 | 1.32  | 0.59 | 0.51 | 0.08 | 0.04 | 0.10 | <LOQ | 0.17 | <LOQ | 0.12 | <LOQ | 0.26 | 0.20 |
| 43 | Merlot treated with bentonite | 1.32          | 1.91 | 4.03  | 1.09 | 2.28 | 0.57 | 0.68 | 1.19 | 0.38 | 0.46 | 0.49 | 0.39 | 0.18 | 1.13 | 0.21 |
| 44 | Merlot treated with bentonite | 1.86          | 0.68 | 0.91  | 0.25 | 0.34 | 0.24 | 0.04 | 0.22 | <LOQ | 0.14 | <LOQ | 0.18 | <LOQ | 0.27 | <LOQ |
| 45 | Merlot treated with bentonite | 0.64          | 0.37 | 4.56  | 0.59 | 1.53 | 0.52 | <LOQ | 0.91 | 0.08 | 0.28 | 0.10 | 0.14 | <LOQ | 0.40 | 0.11 |
| 46 | Merlot treated with bentonite | 1.24          | 1.55 | 5.77  | 0.39 | 0.91 | 0.48 | 0.05 | 0.43 | <LOQ | 0.36 | 0.40 | 0.28 | 0.04 | 0.38 | 0.04 |
| 47 | Merlot treated with bentonite | 2.30          | 2.83 | 7.70  | 1.89 | 2.67 | 0.95 | 0.66 | 2.14 | 0.37 | 0.93 | 0.31 | 0.39 | 0.17 | 1.29 | 0.35 |
| 48 | Merlot treated with bentonite | 1.40          | 3.06 | 2.26  | 0.61 | 1.50 | 0.54 | 0.15 | 0.56 | 0.08 | 0.36 | 0.10 | 0.37 | 0.06 | 0.62 | 0.06 |
| 49 | Merlot treated with bentonite | 0.55          | 2.48 | 10.16 | 1.48 | 0.68 | 1.03 | 0.37 | 0.94 | <LOQ | 0.21 | <LOQ | 0.31 | <LOQ | 0.46 | 0.15 |
| 50 | Merlot treated with bentonite | 0.56          | 1.58 | 2.70  | 0.35 | 0.41 | 0.07 | <LOQ | 0.53 | <LOQ | 0.10 | <LOQ | 0.06 | <LOQ | 0.15 | <LOQ |

[illegible]

| №  | Wine sample                    | Element, µg/L |      |      |      |      |      |      |      |      |      |      |      |      |      |      |
|----|--------------------------------|---------------|------|------|------|------|------|------|------|------|------|------|------|------|------|------|
|    |                                | Y             | La   | Ce   | Pr   | Nd   | Sm   | Eu   | Gd   | Tb   | Dy   | Ho   | Er   | Tm   | Yb   | Lu   |
| 68 | Moldova treated with bentonite | 0.88          | 0.20 | 0.75 | <LOQ | 0.33 | 0.10 | 0.11 | 0.05 | <LOQ | 0.13 | 0.06 | 0.20 | 0.05 | 0.13 | 0.04 |
| 69 | Moldova treated with bentonite | 4.31          | 1.15 | 1.57 | 0.15 | 0.56 | 0.23 | 0.11 | 0.08 | <LOQ | 0.26 | <LOQ | 0.78 | 0.06 | 0.58 | 0.45 |
| 70 | Moldova treated with bentonite | 1.61          | 0.81 | 1.08 | 0.30 | 1.59 | 0.16 | 0.14 | 0.34 | <LOQ | 0.16 | <LOQ | 0.29 | 0.02 | 0.17 | 0.11 |
| 71 | Moldova treated with bentonite | 0.52          | 1.26 | 0.81 | 0.30 | 1.40 | 0.10 | 0.13 | 0.45 | <LOQ | 0.03 | <LOQ | 0.10 | 0.02 | 0.03 | 0.08 |
| 72 | Moldova treated with bentonite | 1.86          | 0.69 | 1.06 | <LOQ | 0.42 | 0.10 | 0.04 | 0.61 | <LOQ | 0.08 | <LOQ | 0.20 | 0.02 | 0.26 | 0.08 |
| 73 | Moldova treated with bentonite | 4.49          | 0.72 | 2.98 | 0.17 | 0.91 | 0.33 | 0.12 | 0.37 | 0.07 | 0.29 | 0.21 | 0.49 | 0.02 | 0.59 | 0.27 |
| 74 | Moldova treated with bentonite | 1.73          | 1.96 | 1.71 | 0.33 | 0.94 | 0.40 | 0.10 | 0.25 | <LOQ | 0.18 | 0.32 | 0.69 | 0.03 | 0.13 | 0.11 |
| 75 | Moldova treated with bentonite | 1.06          | 1.08 | 1.09 | 0.49 | 0.22 | 0.07 | 0.10 | 0.05 | <LOQ | 0.08 | <LOQ | 0.33 | 0.02 | 0.16 | 0.34 |
| 76 | Moldova treated with bentonite | 1.67          | 1.84 | 3.62 | 0.73 | 2.08 | 0.53 | 0.24 | 0.52 | 0.16 | 0.41 | 0.63 | 0.79 | 0.10 | 0.53 | 0.42 |
| 77 | Moldova treated with bentonite | 1.95          | 0.59 | 0.79 | 0.14 | 0.23 | 0.17 | 0.03 | 0.18 | <LOQ | 0.11 | 0.06 | 0.30 | <LOQ | 0.19 | 0.08 |
| 78 | Moldova treated with bentonite | 0.91          | 0.33 | 3.69 | 0.47 | 1.14 | 0.33 | <LOQ | 0.82 | <LOQ | 0.20 | 0.06 | 0.41 | <LOQ | 0.23 | 0.30 |
| 79 | Moldova treated with bentonite | 1.72          | 0.90 | 5.04 | 0.30 | 1.03 | 0.43 | 0.08 | 0.50 | <LOQ | 0.26 | 0.31 | 0.39 | 0.05 | 0.29 | 0.08 |
| 80 | Moldova treated with bentonite | 3.73          | 2.68 | 6.29 | 1.03 | 2.33 | 1.10 | 0.34 | 0.82 | 0.11 | 0.73 | 0.31 | 0.65 | 0.13 | 0.86 | 0.29 |
| 81 | Moldova treated with bentonite | 1.23          | 2.72 | 2.10 | 0.53 | 1.36 | 0.23 | 0.16 | 0.47 | <LOQ | 0.21 | 0.18 | 0.53 | 0.04 | 0.33 | 0.11 |
| 82 | Moldova treated with bentonite | 0.92          | 2.29 | 9.50 | 1.25 | 0.51 | 1.23 | 0.36 | 1.21 | 0.05 | 0.16 | 0.15 | 0.48 | 0.05 | 0.23 | 0.38 |
| 83 | Moldova treated with bentonite | 0.47          | 1.41 | 2.37 | 0.33 | 0.33 | 0.07 | <LOQ | 0.37 | <LOQ | 0.06 | <LOQ | 0.10 | 0.03 | 0.08 | 0.08 |
| 84 | Moldova treated with bentonite | 0.65          | 1.34 | 2.53 | 0.34 | 0.48 | 0.19 | 0.04 | 0.35 | <LOQ | 0.05 | <LOQ | 0.10 | <LOQ | 0.13 | 0.04 |

| №  | Wine sample                    | Element, µg/L |      |      |      |      |      |      |      |      |      |      |      |      |      |      |
|----|--------------------------------|---------------|------|------|------|------|------|------|------|------|------|------|------|------|------|------|
|    |                                | Y             | La   | Ce   | Pr   | Nd   | Sm   | Eu   | Gd   | Tb   | Dy   | Ho   | Er   | Tm   | Yb   | Lu   |
| 85 | Moldova treated with bentonite | 3.69          | 0.97 | 4.32 | 0.33 | 1.04 | 0.53 | 0.10 | 0.66 | 0.05 | 0.47 | 0.24 | 0.46 | 0.14 | 0.29 | 0.49 |
| 86 | Moldova treated with bentonite | 3.95          | 1.01 | 4.62 | 0.32 | 0.89 | 0.51 | 0.09 | 0.61 | <LOQ | 0.47 | 0.20 | 0.47 | 0.18 | 0.28 | 0.56 |
| 87 | Moldova treated with bentonite | 1.20          | 1.64 | 3.89 | 0.49 | 1.53 | 0.66 | 0.08 | 1.18 | <LOQ | 0.79 | 0.18 | 0.49 | 0.07 | 0.69 | 0.33 |
| 88 | Moldova treated with bentonite | 1.39          | 1.54 | 4.03 | 0.52 | 1.60 | 1.12 | 0.06 | 1.15 | 0.06 | 0.89 | 0.21 | 0.44 | 0.08 | 0.68 | 0.33 |
| 89 | Moldova treated with bentonite | 1.67          | 1.78 | 5.64 | 0.61 | 1.71 | 1.18 | 0.15 | 1.28 | 0.10 | 0.93 | 0.24 | 0.46 | 0.13 | 0.82 | 0.37 |
| 90 | Moldova treated with bentonite | 4.97          | 1.21 | 6.18 | 0.45 | 1.82 | 0.56 | 0.16 | 0.74 | 0.06 | 0.46 | 0.24 | 0.52 | 0.17 | 0.38 | 0.61 |
| 91 | Moldova treated with bentonite | 1.22          | 1.32 | 2.66 | 0.26 | 0.41 | 0.26 | 0.04 | 0.38 | <LOQ | 0.08 | 0.07 | 0.39 | 0.04 | 0.30 | 0.08 |
| 92 | Moldova treated with bentonite | 1.22          | 0.33 | 1.01 | <LOQ | 0.34 | 0.07 | 0.10 | 0.21 | <LOQ | 0.05 | <LOQ | 0.29 | <LOQ | 0.13 | 0.04 |
| 93 | Moldova treated with bentonite | 0.70          | 0.40 | 1.25 | 0.14 | 0.41 | 0.07 | 0.04 | 0.28 | <LOQ | 0.08 | <LOQ | 0.28 | 0.03 | 0.06 | 0.07 |
| 94 | Moldova treated with bentonite | 1.44          | 2.07 | 3.58 | 0.64 | 1.52 | 0.66 | 0.17 | 0.95 | 0.12 | 0.93 | 0.16 | 0.82 | 0.07 | 0.43 | 0.33 |
| 95 | Moldova treated with bentonite | 1.09          | 0.63 | 1.42 | 0.33 | 0.58 | 0.33 | 0.09 | 0.35 | <LOQ | 0.25 | <LOQ | 0.35 | 0.02 | 0.40 | 0.12 |
| 96 | Moldova treated with bentonite | 1.26          | 0.49 | 1.19 | <LOQ | 0.48 | 0.20 | 0.20 | 0.02 | <LOQ | 0.07 | <LOQ | 0.19 | 0.02 | 0.20 | 0.08 |
| 97 | Moldova treated with bentonite | 1.63          | 0.79 | 1.66 | 0.28 | 0.85 | 0.31 | 0.09 | 0.15 | <LOQ | 0.08 | <LOQ | 0.20 | 0.07 | 0.06 | 0.08 |
| 98 | Moldova treated with bentonite | 2.50          | 1.67 | 5.85 | 0.15 | 0.76 | 0.33 | 0.16 | 0.21 | <LOQ | 0.16 | <LOQ | 0.79 | 0.03 | 0.10 | 0.08 |
| 99 | Moldova treated with bentonite | 4.30          | 1.88 | 1.53 | 0.32 | 1.73 | 0.63 | 0.28 | 0.73 | 0.08 | 0.91 | 0.37 | 1.08 | 0.14 | 0.85 | 0.70 |
